# Supplementary material for: Characteristics and prognosis of patients with COVID-19 and hematological diseases in Japan: a cross-sectional study
Source: PubMed Central journal article supplement (PMC10830869; doi:10.1007/s12185-023-03685-w), 2024-01-03

Supplemental Figure S1

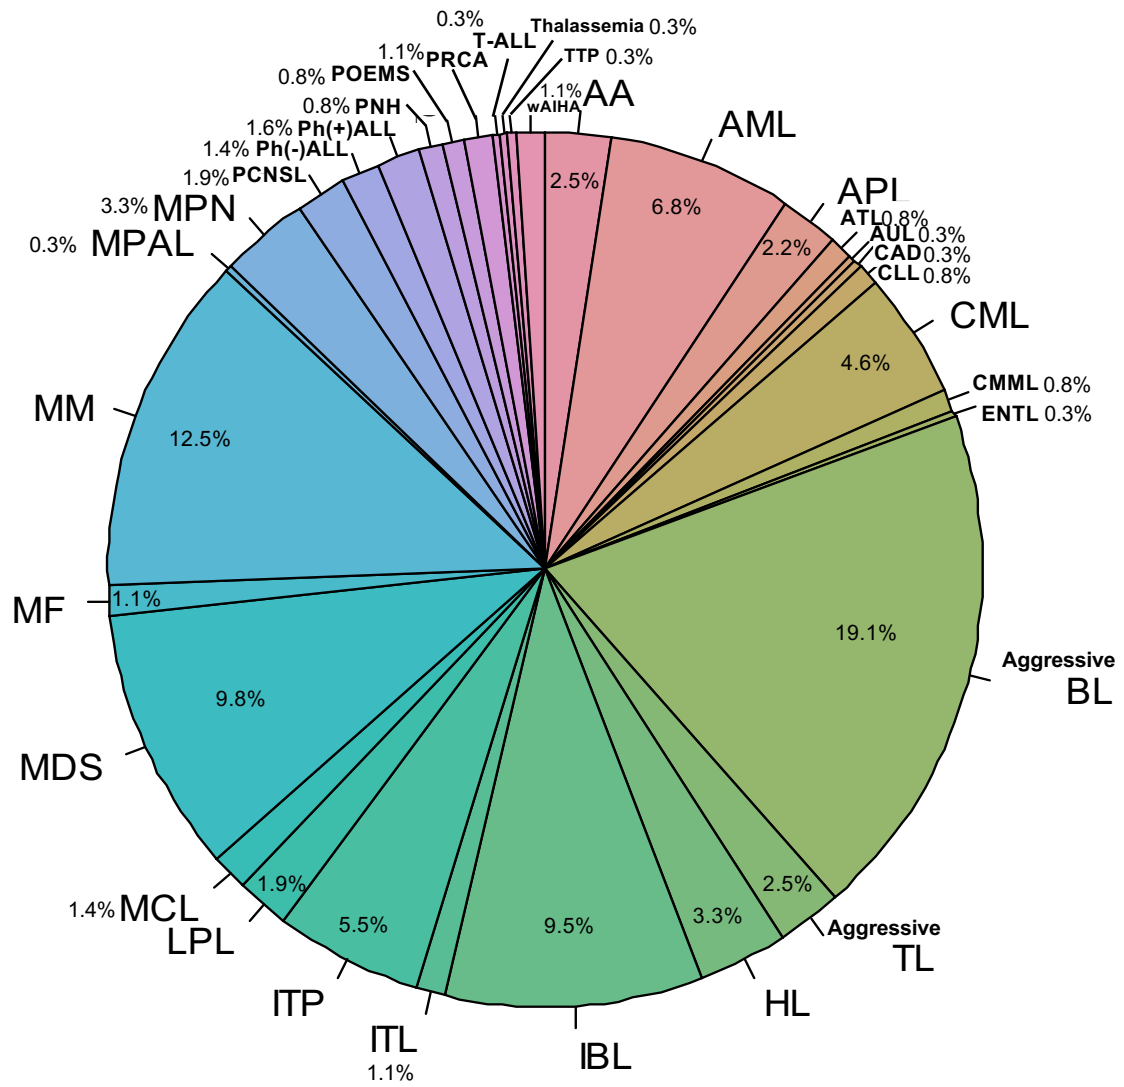

## Supplemental Figure S2

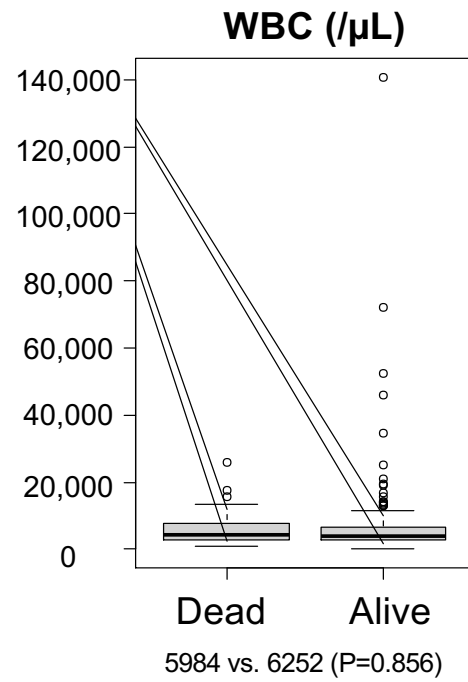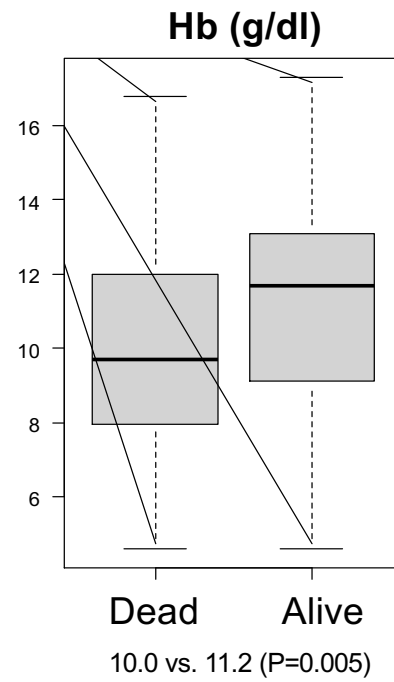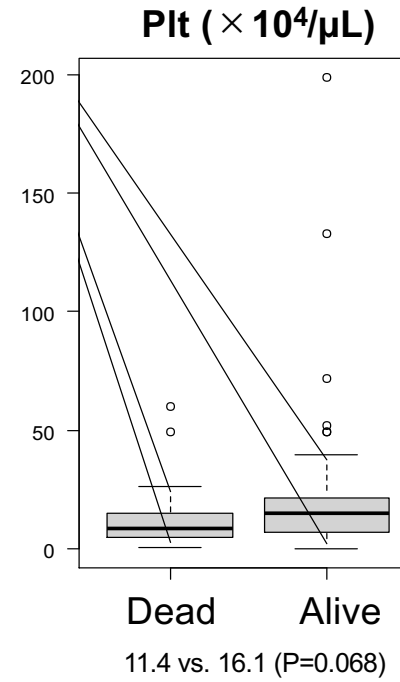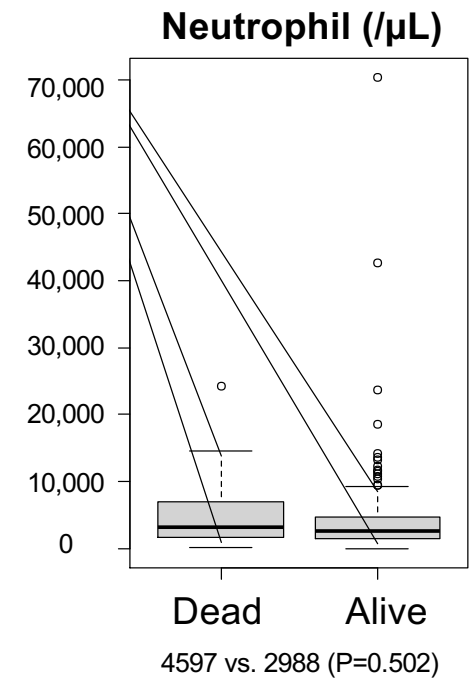

## Supplemental Figure S2

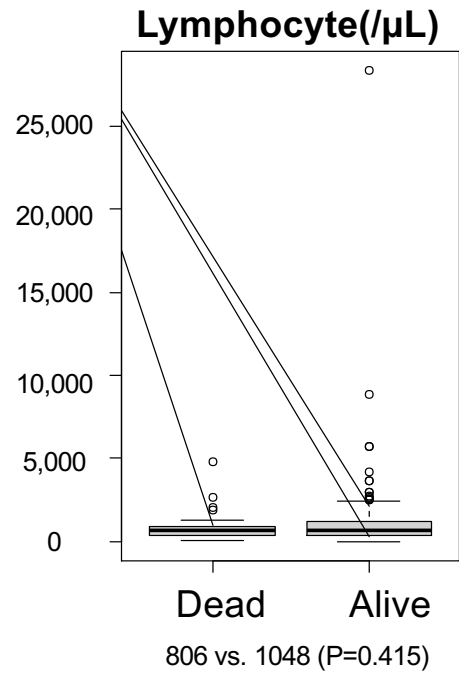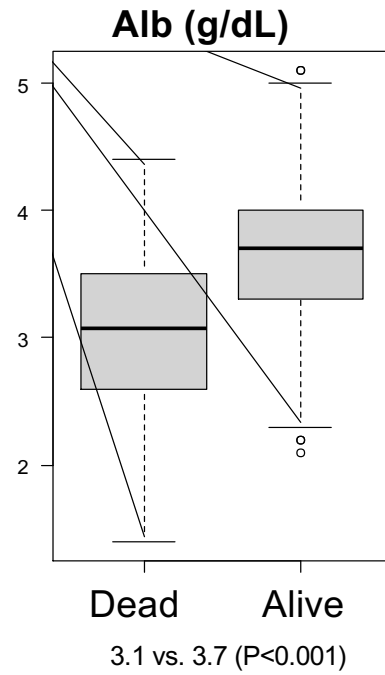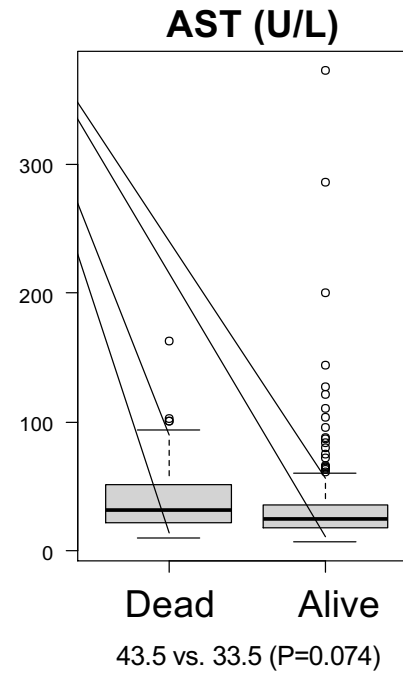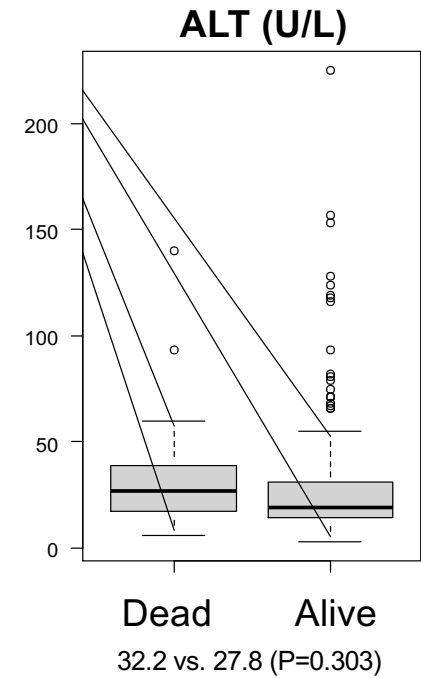

## Supplemental Figure S2

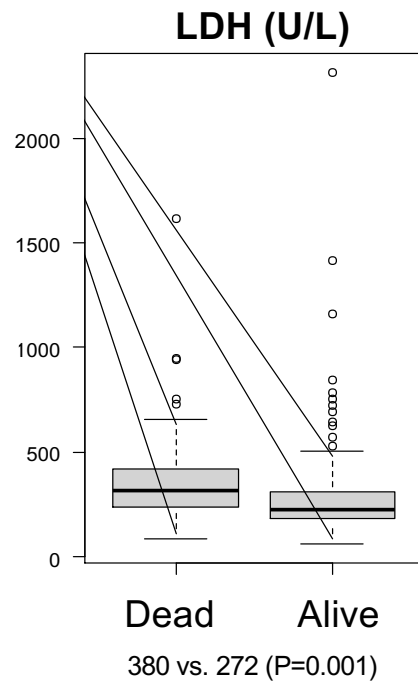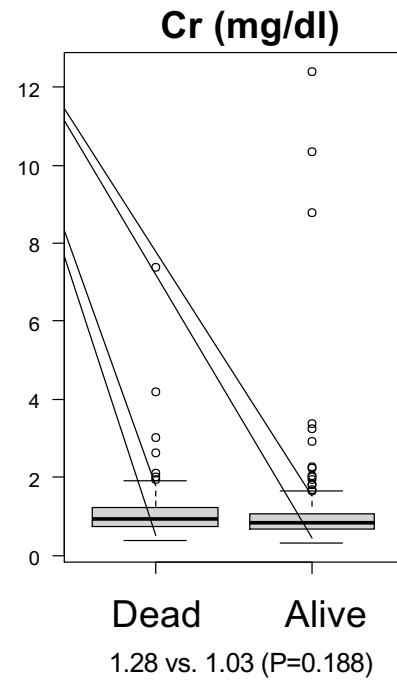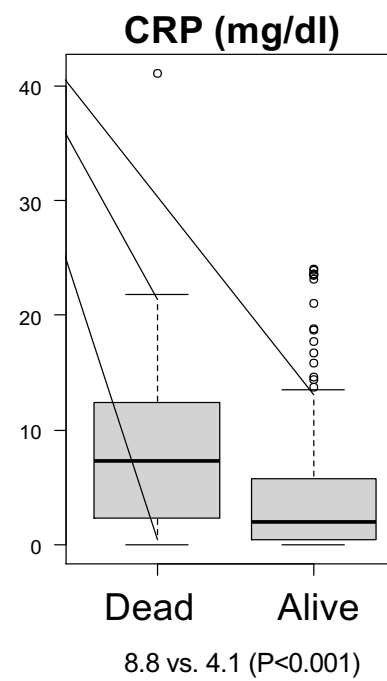

## Supplemental Figure S2

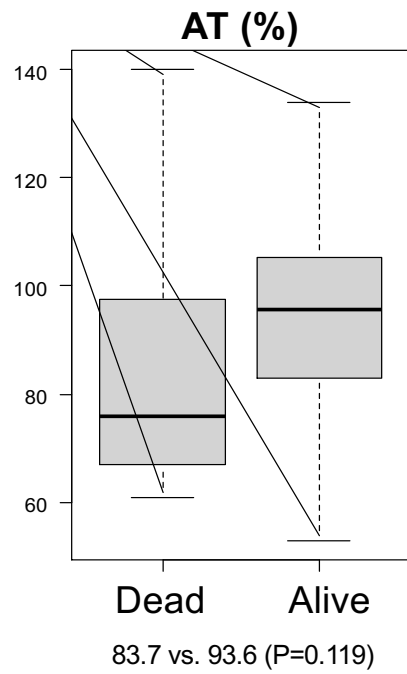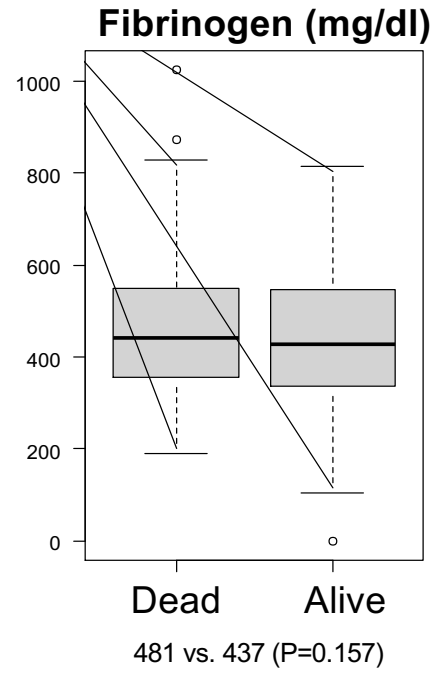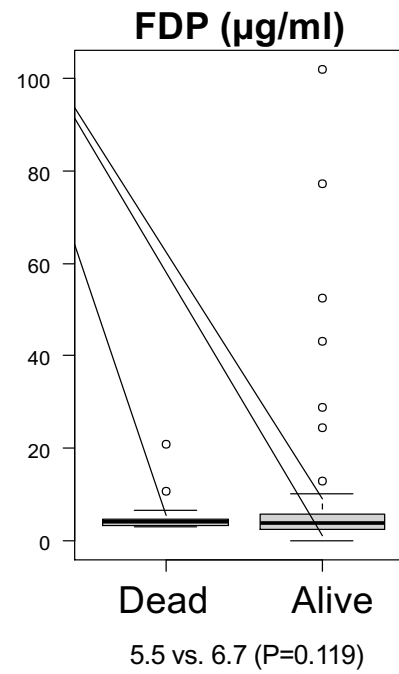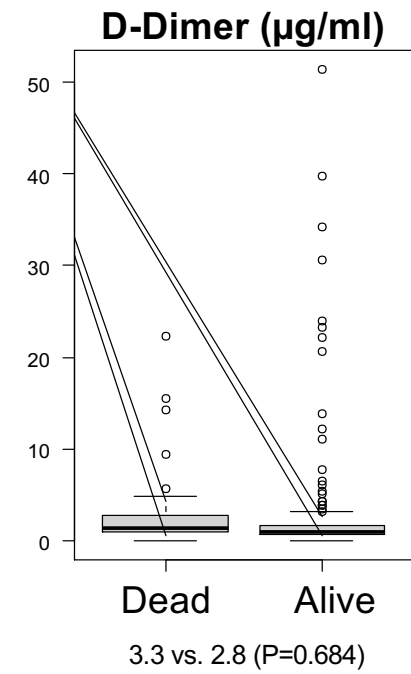

### Supplemental Figure S3

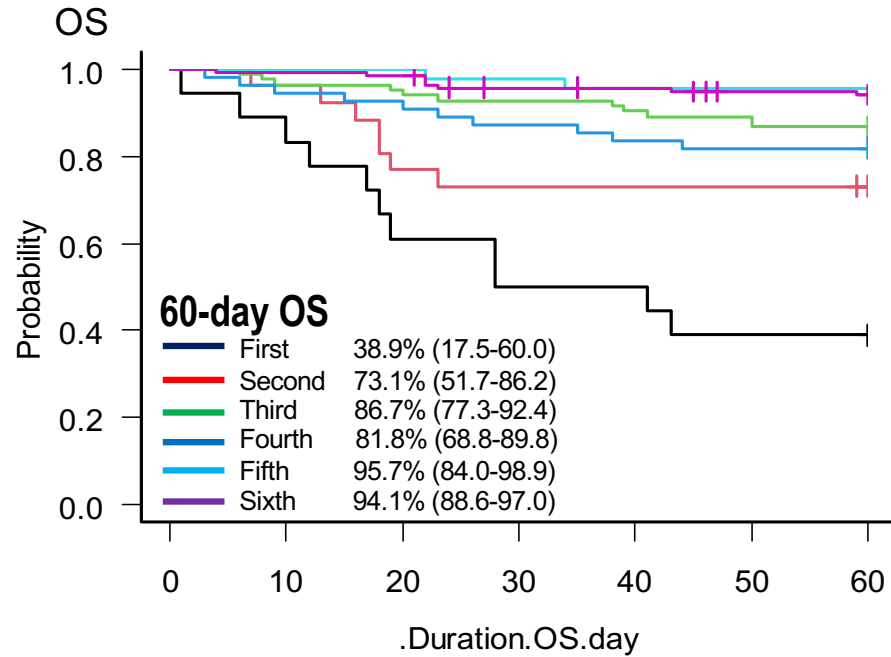

Number at risk

|     |     |     |     |     |     |     |
|-----|-----|-----|-----|-----|-----|-----|
| 18  | 16  | 11  | 9   | 9   | 7   | 7   |
| 26  | 25  | 20  | 19  | 19  | 19  | 18  |
| 83  | 80  | 79  | 77  | 75  | 74  | 72  |
| 55  | 52  | 51  | 48  | 46  | 45  | 45  |
| 47  | 47  | 47  | 46  | 45  | 45  | 45  |
| 138 | 137 | 136 | 129 | 128 | 124 | 123 |

## Supplemental Figure S4

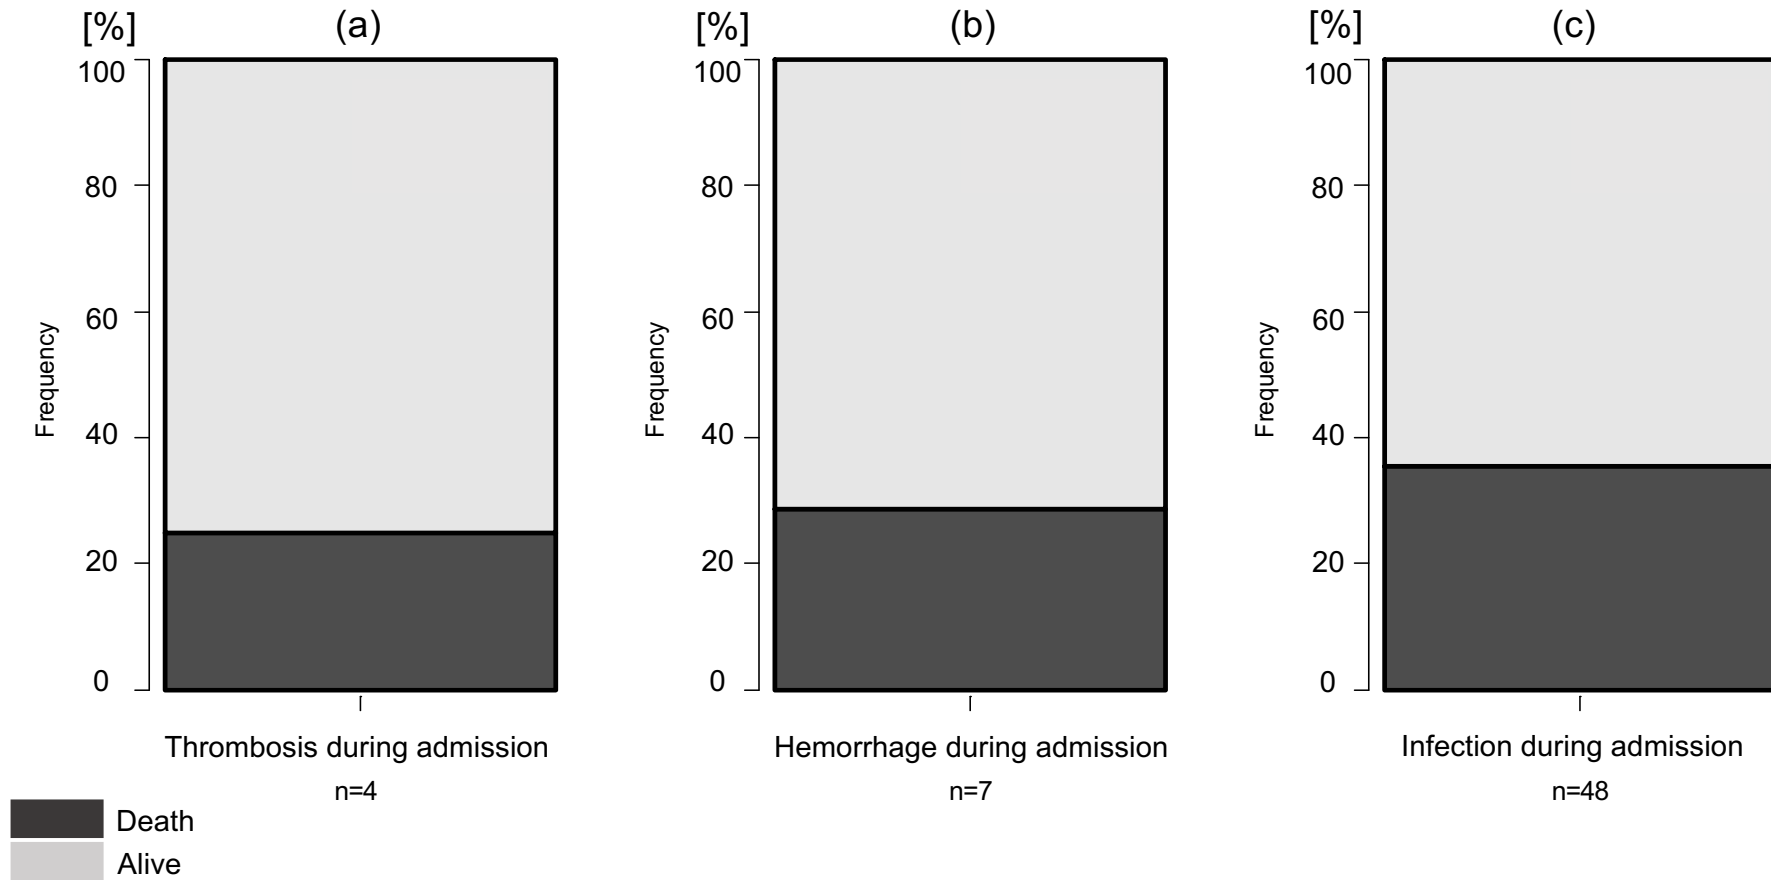

Supplement: 12185_2023_3685_MOESM1_ESM.pdf [file 12185_2023_3685_MOESM1_ESM.pdf]
